# Supplementary material for: Mitochondrial fission is a critical modulator of mutant APP-induced neural toxicity
Source: PubMed Central journal article supplement (PMC8042169; doi:10.1016/j.jbc.2021.100469), 2021-02-25
Supplement: mmc1.pdf [file mmc1.pdf]

SUPPORTING FIGURES AND FIGURE LEGENDS

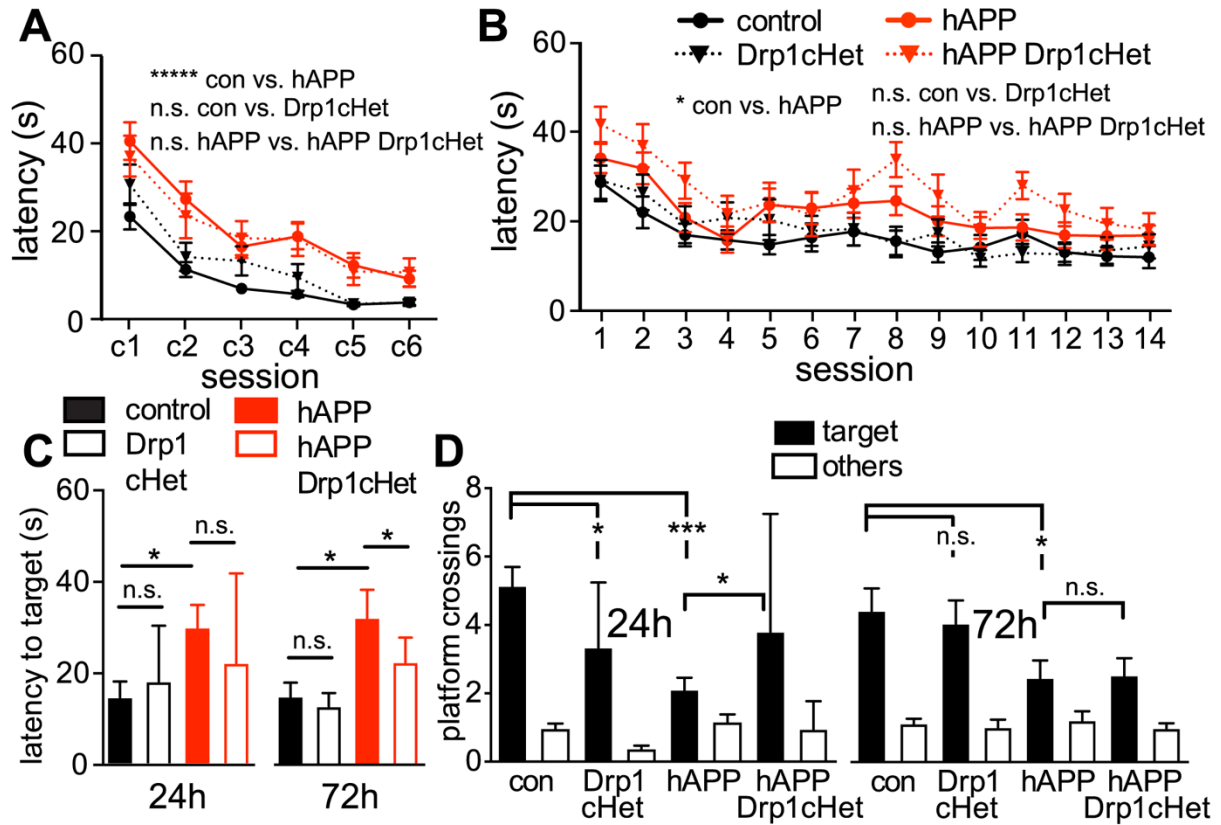

**Figure S1. Drp1 heterozygosity may protect against memory deficits in hAPP mice.**

*A, B*, Drp1cHet ( $Drp1^{wt/lox};CamKII-Cre$ ) and hAPP Drp1cHet ( $hAPP-J20;Drp1^{wt/lox};CamKII-Cre$ ) mice compared to wild-type and hAPP ( $hAPP-J20;Drp1^{wt/lox}$  and  $hAPP-J20;Drp1^{lox/lox}$ ) did not exhibit differences in procedural cued training nor memory during hidden-platform training in 6–7-month-old mice over 14 sessions (7 days), Data are means  $\pm$  S.E.M.; n.s. = not significant,  $*p < 0.05$ ,  $****p < 0.00001$ , by average rank latency with mixed effect modeling,  $n = 15-22$  mice/group. *C*, Spatial memory was evaluated using MWM probe trials at 24 and 72 h with the hidden-platform removed, and measured by latency to cross the former hidden platform location (target) and *D*, number of target and non-target (other) platform location crossings. hAPP mice showed significant memory deficits that were partially blocked by Drp1 heterozygosity.  $n = 15-22$  mice/group. Data are means  $\pm$  S.E.M.; n.s. = not significant,  $*p < 0.05$ ,  $***p < 0.001$  by Cox proportional hazards regression models (latency to cross) and Quasi-Poisson generalized linear models (platform crossings). Wild-type and hAPP data presented in this figure are also shown in Figure 1, and all mice in Figure 1 and S1 were evaluated in the same experiment, but the figures are separated for clarity.

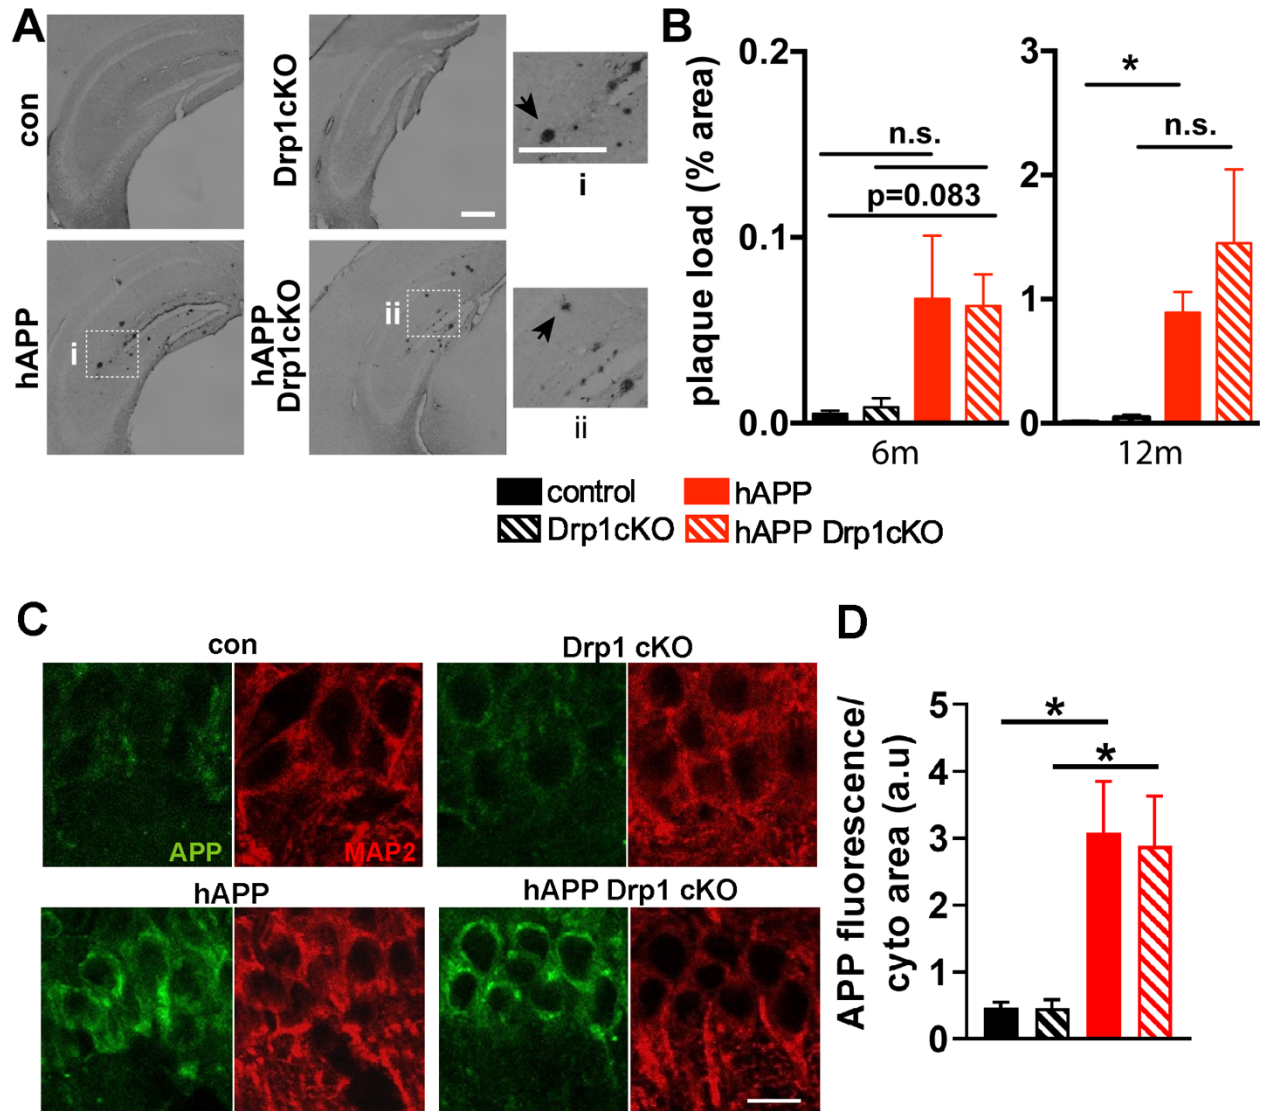

**Figure S2. Drp1cKO does not impact amyloid beta deposition or APP levels.**

*A*, A $\beta$  deposits in hippocampi of 12-month-old hAPP mice with or without Drp1, identified by immunohistochemistry (82E1 antibody). Scale bar: 400  $\mu$ m. *B*, hAPP expression led to A $\beta$  deposition at 6 and 12 months, although comparisons did not reach significance until 12 months. Drp1cKO had no impact on A $\beta$  deposition. Data are means  $\pm$  S.E.M.; n=4–5 mice/group (with 3 slices of hippocampus examined per mouse); n.s. = not significant, p=0.083, \*p<0.05 by Welch's ANOVA and Games-Howell *post hoc* test (used instead of two-way ANOVA due to significant Levene's test for equality of variance). *C*, Immunostaining for APP in CA1 neurons in hippocampal slices from 6-7- month old Drp1WT (control), Drp1cKO, hAPP-J20 (hAPP), and hAPP-J20 Drp1cKO (hAPP Drp1cKO) mice. Cell bodies were defined by MAP2 staining. *D*, Quantification of APP staining. n=4 mice/group (2-3 slices/mouse, 41- 43 cells/group). Data show mean  $\pm$  SEM; p=0.0238, p=0.0356, \*p<0.05, by two-way ANOVA and Holm-Sidak's multiple comparisons test. The scale bar is 30 $\mu$ m.

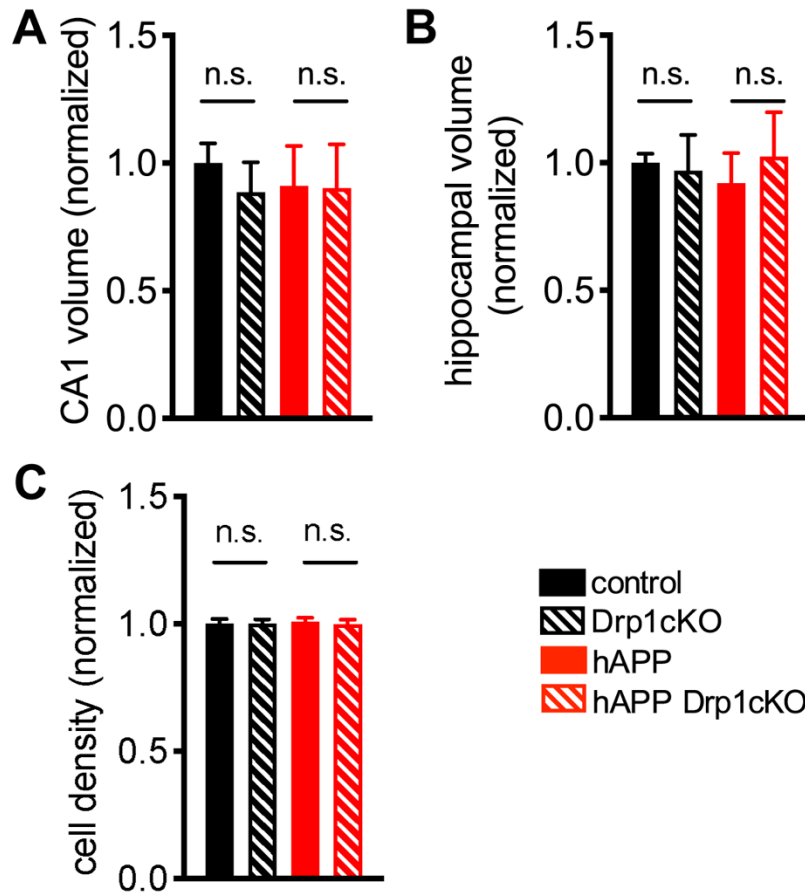

**Figure S3. hAPP Drp1cKO does not cause cell loss in vivo at 6 months.**

*A, B*, CA1 (*A*) and overall hippocampal (*B*) volume were similar between groups in 6-month-old mice.  $n=4$  mice/group (4–8 slices/mouse). *C*, Drp1cKO and hAPP Drp1cKO mice did not show any decrease in CA1 cell density at 6 months of age. Data are means  $\pm$  S.E.M.;  $n=4$  mice/group (4 slices/mouse). n.s. (not significant) by two-way ANOVA and Holm-Sidak *post hoc* test.

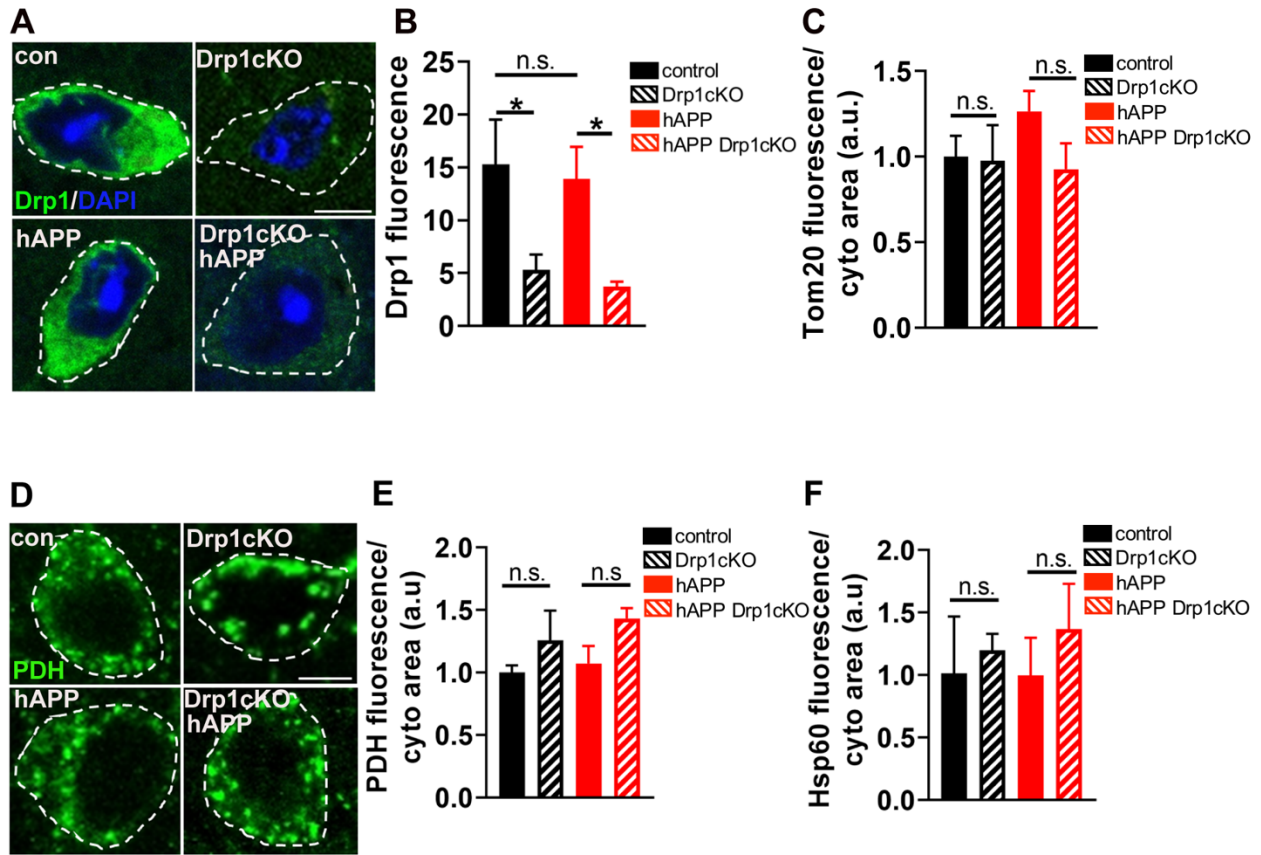

**Figure S4. hAPP does not impact mitochondrial content in hAPP Drp1cKO neurons.**

*A, B*, Mean Drp1 fluorescence in the cytoplasm of CA1 neurons in hippocampal slices from 6-7- month old Drp1WT (control), Drp1cKO, hAPP-J20 (hAPP), and hAPP-J20 Drp1cKO (hAPP Drp1cKO) mice. *C-F*, Mitochondria in CA1 neurons identified by the outer mitochondrial membrane protein Tom20 (*C*, see also Fig. 2E), and the mitochondrial matrix proteins PDH (montage in *D*, *E*) and HSP60 (*F*). Quantification revealed no differences between groups in the mean cytoplasmic fluorescence of any of the mitochondrial markers of CA1 cells at 6 months. Cell bodies (outer stippled outlines) were defined by MAP2 staining.  $n=4$  mice/group (*A*, 2-3 slices per mouse, 16-19 cells/group; *C, E, F*, 3-4 slices per mouse, 50-69 cells/group). n.s. (not significant) by two-way ANOVA and Holm-Sidak *post hoc* test. The scale bar is 5  $\mu\text{m}$ .

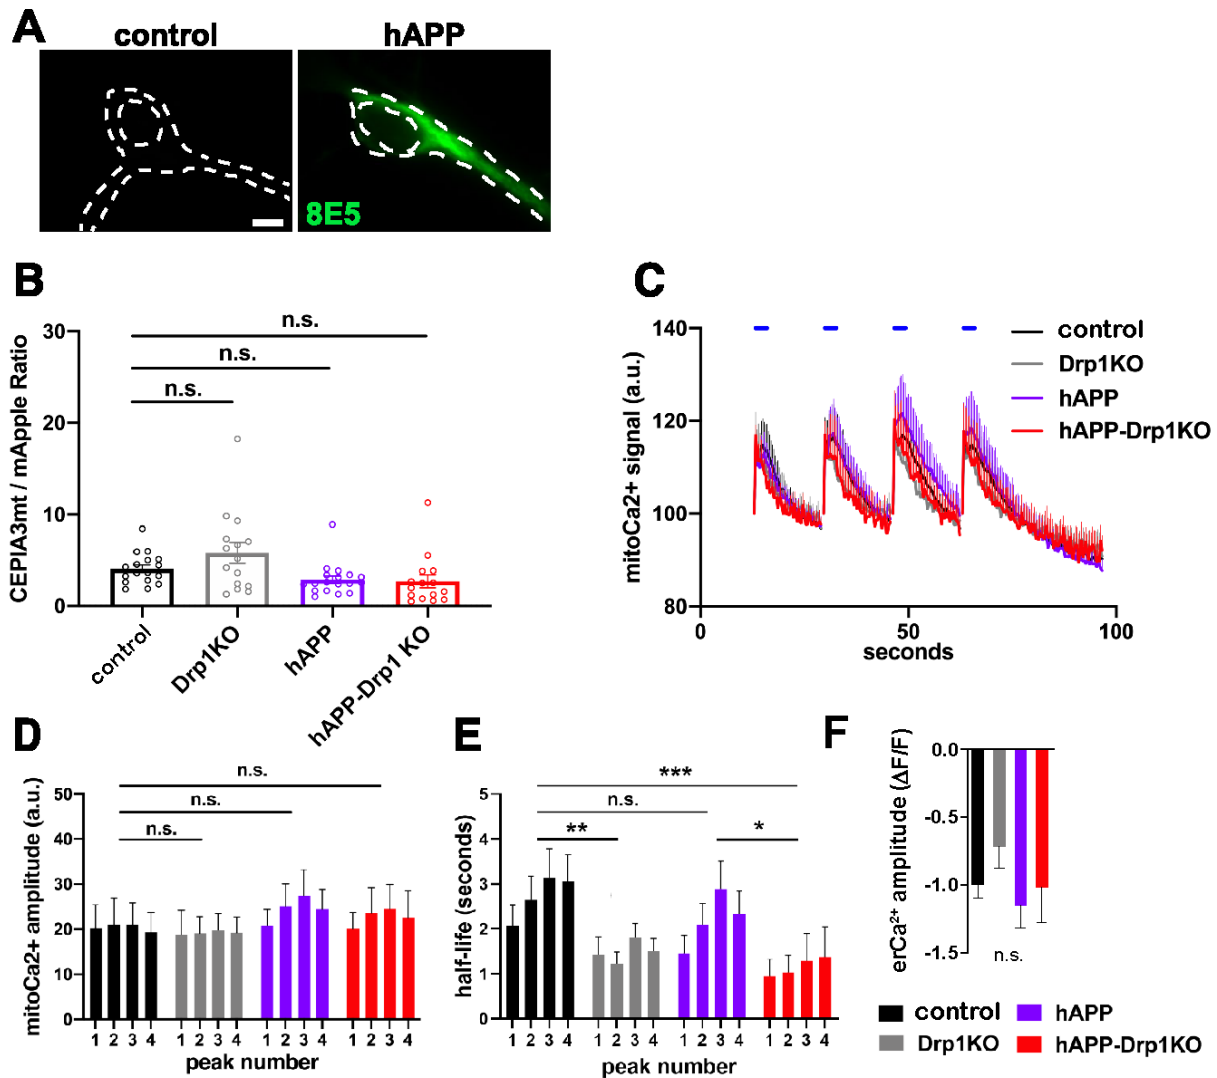

**Figure S5. Mitochondrial calcium dynamics of neurons that recover mitoCa<sup>2+</sup> following stimulation.** *A*, Drp1<sup>lox/lox</sup> hippocampal neurons transfected with hAPP express the protein, as assessed by the 8E5 antibody, which is specific to human APP. Scale bar is 5  $\mu$ m. *B-D*, Drp1KO and control neurons were co-transfected with the mitoCa<sup>2+</sup> sensor CEPIA3mt, mApple, and hAPP or its control vector, and were subjected to a sequence of four individual electrical stimuli (30Hz for 3s, blue horizontal lines) to evoke calcium entry. *B*, Basal mitoCa<sup>2+</sup> level estimated by the ratio of fluorescence intensity of CEPIA3mt to mApple. There are no differences between the three experimental groups and control.  $n=15-18$  coverslips (1 cell/coverslip), compilation of 6 independent experiments. Data show mean  $\pm$  SEM; not significant (n.s.) by Welch's ANOVA test and Games-Howell multiple comparison test. *C*, Average mitoCa<sup>2+</sup> levels for neurons that successfully recovered mitoCa<sup>2+</sup> following each stimulation for control (black), Drp1KO (grey), hAPP (purple) and hAPP-Drp1KO (red) conditions. *D*, Average amplitude for each mitoCa<sup>2+</sup> peak in (C). All groups exhibited similar mitoCa<sup>2+</sup> loading during electrically-evoked calcium entry as control. *E*, Average half-life in seconds for each mitoCa<sup>2+</sup> peak in (C). Drp1KO alone or in combination with hAPP increases mitoCa<sup>2+</sup> efflux rate, while hAPP alone has no impact on half-life.  $n=8-16$  coverslips/group (1 cell/coverslip), compilation of 6 independent experiments. *C-E*, Data show mean  $\pm$  SEM; n.s. (not significant), \* $p<0.05$ , \*\* $p<0.01$ , \*\*\* $p<0.001$  by two-way repeated measures ANOVA and Holm-Sidak *post*

*hoc* test. *F*, Drp1KO neurons with or without mutant hAPP were co-transfected with the ER-targeted calcium sensor R-CEPIA1er (45). ER calcium was measured while stimulating release (measured as a decrease in calcium) with caffeine (25 mM). Neither hAPP nor Drp1KO significantly affected the magnitude of ER calcium release. n=8–10 coverslips/group (with 11–17 cells/group). Data are means  $\pm$  S.E.M; comparisons are not significant (n.s.) by one-way ANOVA and Holm-Sidak *post hoc* test.

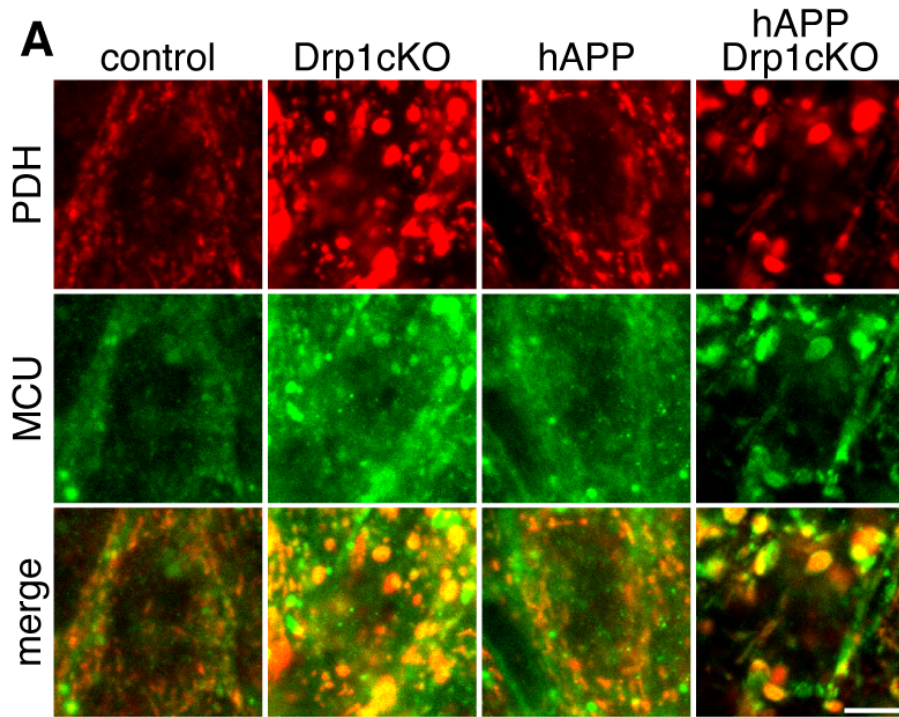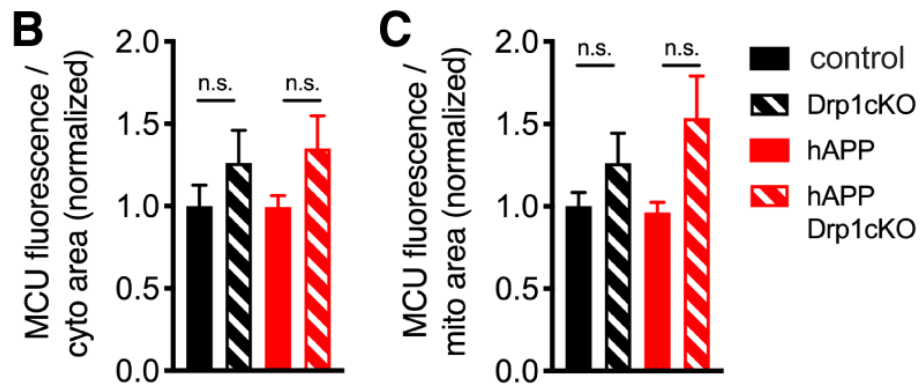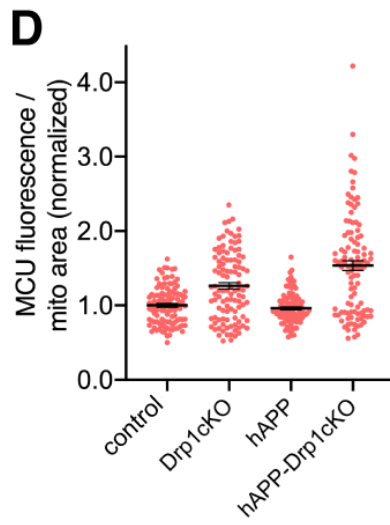



**Figure S6. Drp1KO and hAPP do not affect MCU expression in hippocampal neurons.**

*A*, CA1 hippocampal neurons from 6-7- month old Drp1WT (control), Drp1cKO, hAPP-J20 (hAPP), and hAPP-J20 Drp1cKO (hAPP Drp1cKO) mice immunostained for MCU (green) and PDH (red). Scale bar is 5  $\mu$ m. *B,C*, Quantitation revealed no differences between groups in the mean cytoplasmic fluorescence of MCU (*B*), or in the MCU fluorescence intensity specifically in mitochondria, identified by overlap with PDH staining (*C*). *D*, Graph shows individual data points (cells) from analysis performed in (*C*). Data are means  $\pm$  S.E.M.; n = 6 sections/group (*B*, 2 sections/mouse, 6 cells/section; *C*, 2 sections/mouse, 18 cells/section). n.s. = not significant by Welch's ANOVA and Games-Howell *post-hoc* test.



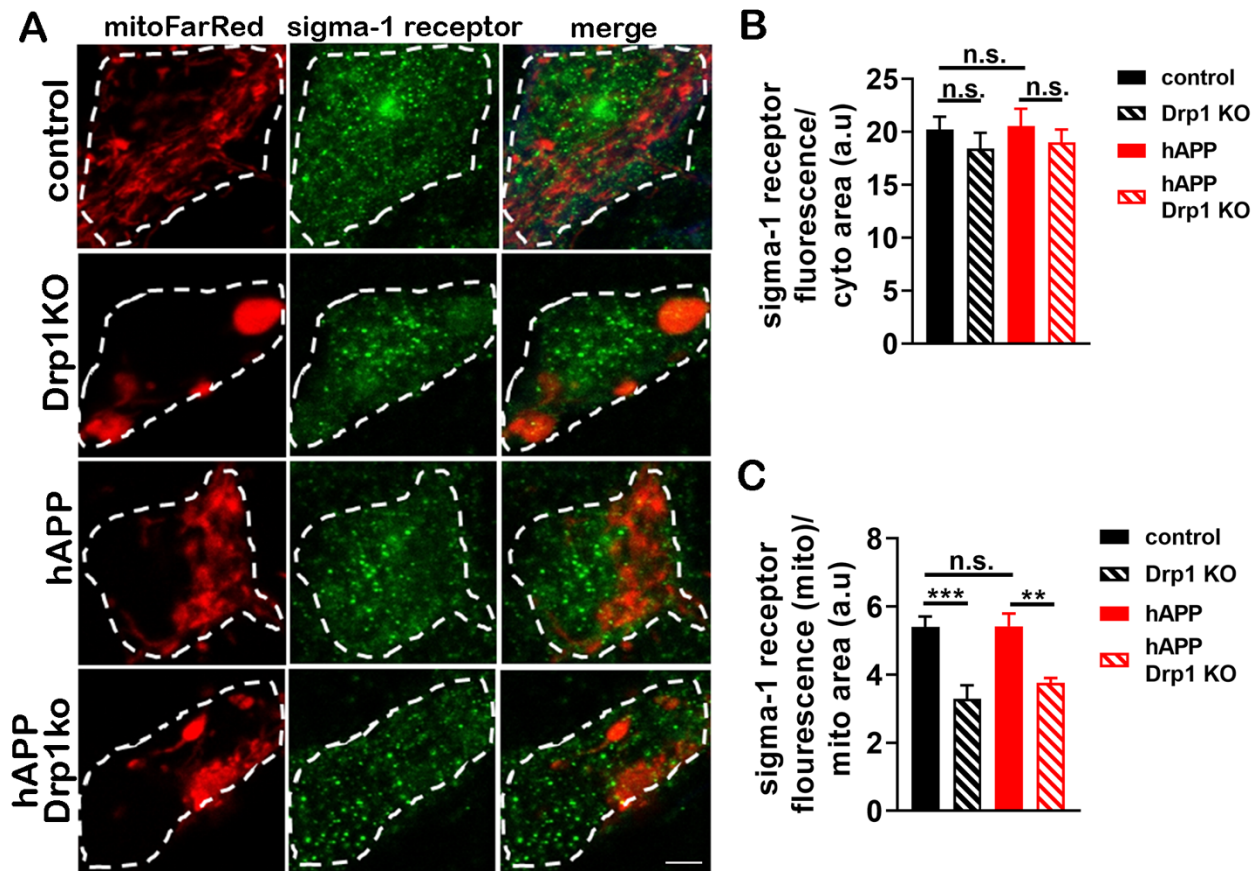

**Figure S7. Drp1 loss decreases sigma-1 receptor co-localization with mitochondria in cultured neurons.** Drp1KO and control neurons expressing mutant hAPP, and/or control vector (control), as well as mitoFarRed to visualize the mitochondria, were immunostained for sigma-1 receptor (green) and MAP2 (not shown) to define the margins of cell bodies (white stippled lines). Scale bar is 4  $\mu$ m. *B*, Mean cytosolic fluorescence of sigma-1 receptor was unchanged between groups. *C*, However, both Drp1KO and hAPP Drp1KO had significantly decreased sigma-1 receptor fluorescence co-localizing with mitochondria.  $n = 16-24$  cells/group from 4 coverslips. Data are means  $\pm$  S.E.M.; n.s. = not significant, \*\* $p < 0.001$ , \*\*\* $p < 0.0001$  by two-way ANOVA and Holm-Sidak *post hoc* test.

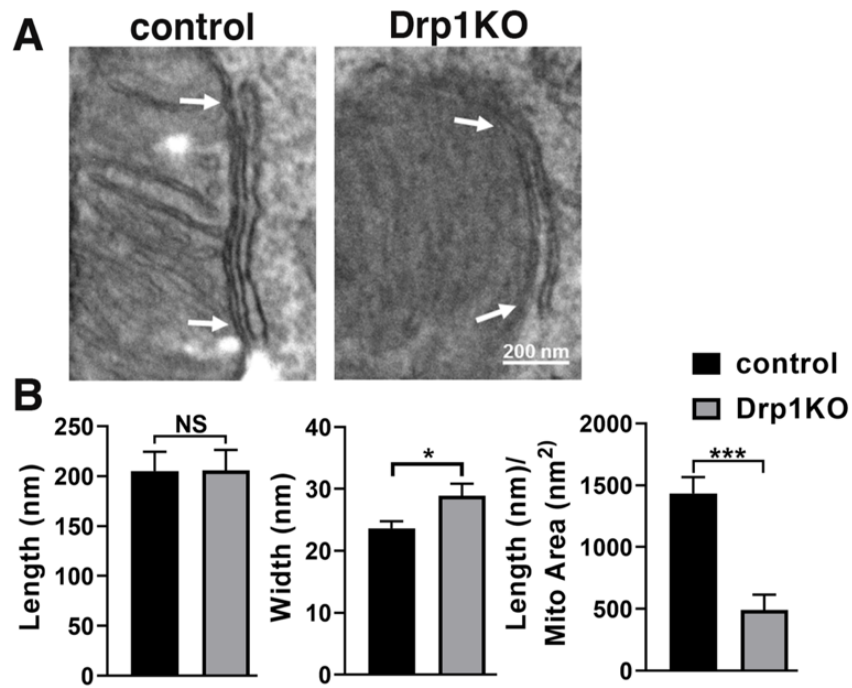

**Figure S8. Drp1 loss decreases MAMs in neurons.** *A*, EM images show representative MAMs (arrows) in the cell body of control and Drp1KO hippocampal neurons. MAMs are defined as <50 nm separation between the ER and mitochondria (white arrows). *B*, Drp1KO mitochondria have MAMs with similar length as controls. However, the width is increased, while the length of ER-mitochondria contact per mitochondrial area is markedly decreased in Drp1KO mitochondria. n=50 mitochondria in control, n=25 mitochondria in Drp1KO from 2 independent experiments. NS = not significant, \* $p < 0.05$ , \*\*\* $p < 0.001$  by unpaired *t*-test. Scale bar is 200nm.

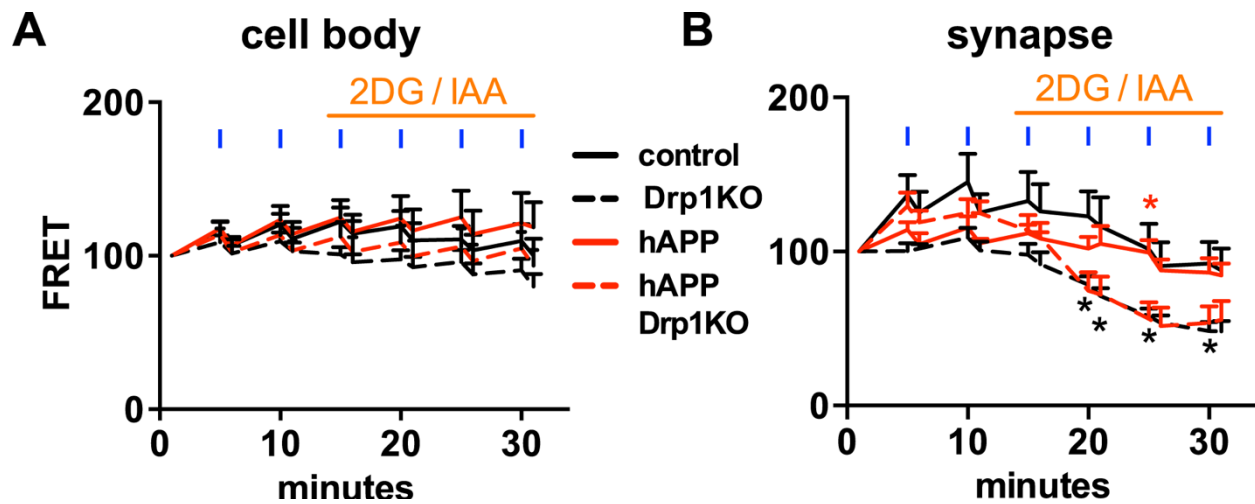

**Figure S9. hAPP does not cause or accentuate Drp1KO-induced mitochondrial ATP deficits at the synapse.** Drp1-floxed hippocampal neurons were co-transfected with an ATP-based FRET sensor (ATP1.03<sup>YEMK</sup>) (82), and a control vector (control), Cre (Drp1KO), and/or mutant hAPP. *A, B*, To measure mitochondrial-derived ATP levels, glycolysis was blocked with 2-deoxyglucose (2DG) and iodoacetate (IAA, orange bar). Neurons were stimulated at 30 Hz\*3 s (blue vertical bars). *A*, All groups maintained similar ATP levels observed at the cell body, with no significant differences between groups. *B*, Neurons lacking Drp1 were unable to maintain ATP levels at the synapse, but hAPP had no effect on ATP. Data are means  $\pm$  S.E.M.; \* $p < 0.05$  control *versus* Drp1KO (in black) and hAPP *versus* hAPP Drp1KO (in red) by two-way ANOVA with repeated measures and Holm-Sidak *post hoc* test,  $n = 7-11$  coverslips/group (with 72-106 boutons and 9-14 cells per group).
